# Supplementary material for: Small magnetic nanoparticles decorating reduced graphene oxides to tune the electromagnetic attenuation capacity
Source: Royal Society of Chemistry journal article supplement (doi:10.1039/c6tc02020h), 2016-01-01
Supplement: c6tc02020h1.pdf [file c6tc02020h1.pdf]

# Supporting Information

## Small magnetic nanoparticles decorating reduced graphene oxides to tune electromagnetic attenuation capacity

Jun-Zhe He,<sup>a</sup> Xi-Xi Wang,<sup>a</sup> Yan-Lan Zhang,<sup>a</sup> and Mao-Sheng Cao<sup>\*a</sup>

<sup>a</sup>School of Material Science and Engineering, Beijing Institute of Technology, Beijing

100081, China. \*E-mail: [caomaosheng@bit.edu.cn](mailto:caomaosheng@bit.edu.cn);

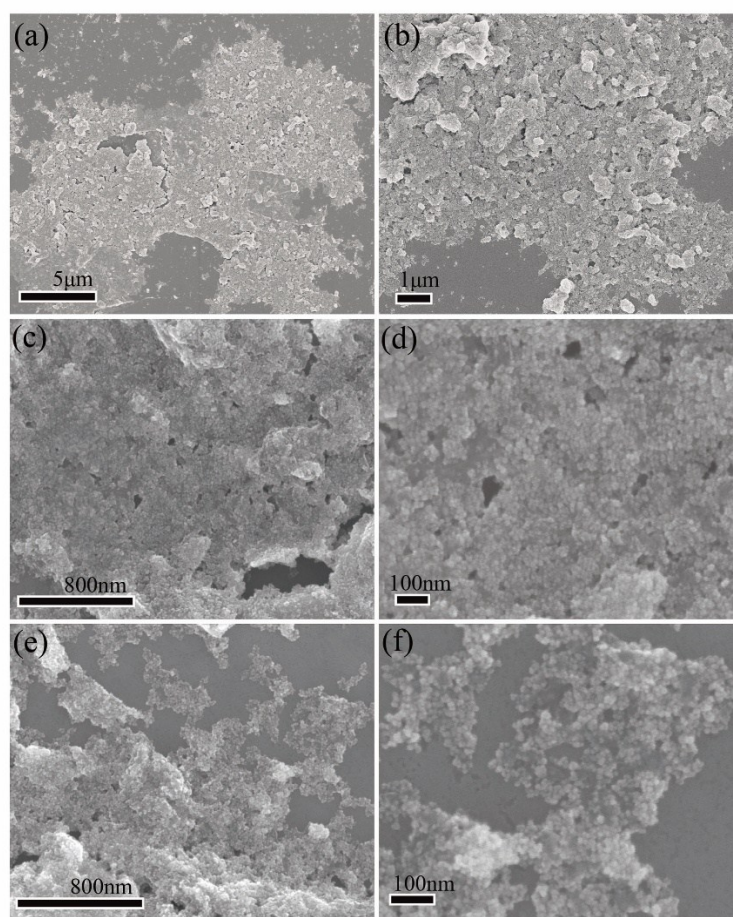

Fig.S1 The SEM images of NiFe<sub>2</sub>O<sub>4</sub>/r-GO.

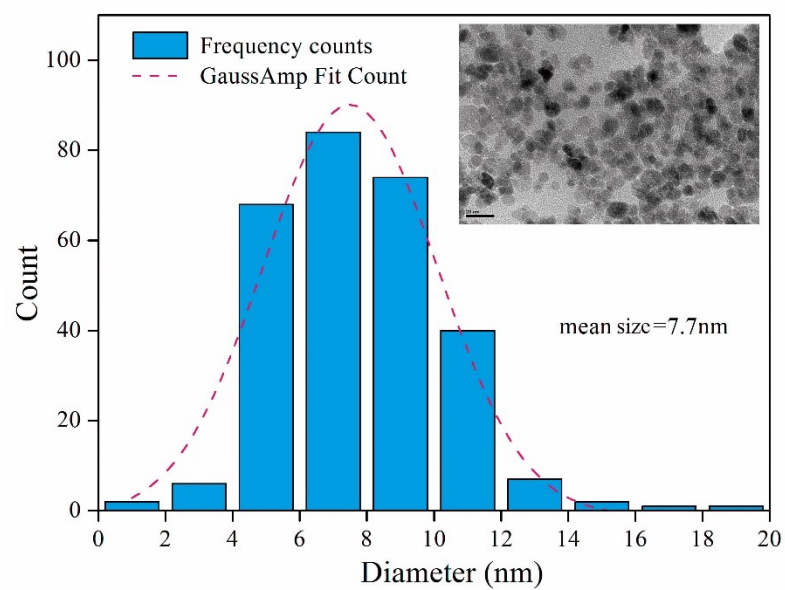

Fig.S2 Particle size distribution histogram of  $\text{NiFe}_2\text{O}_4$  nanoparticles from the inset.

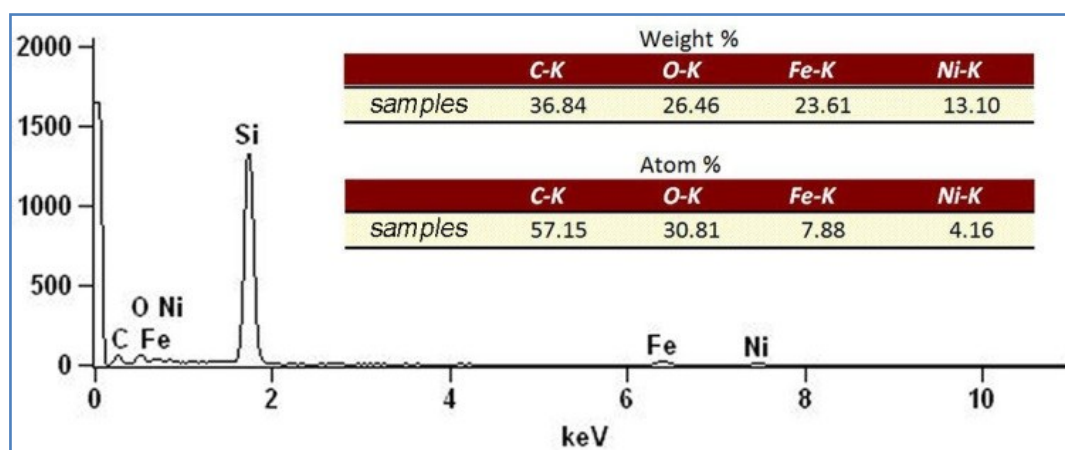

Fig.S3 The energy dispersive spectroscopy (EDS) analysis of NiFe<sub>2</sub>O<sub>4</sub>/r-GO samples; the mass percent and atom percent is in the inset

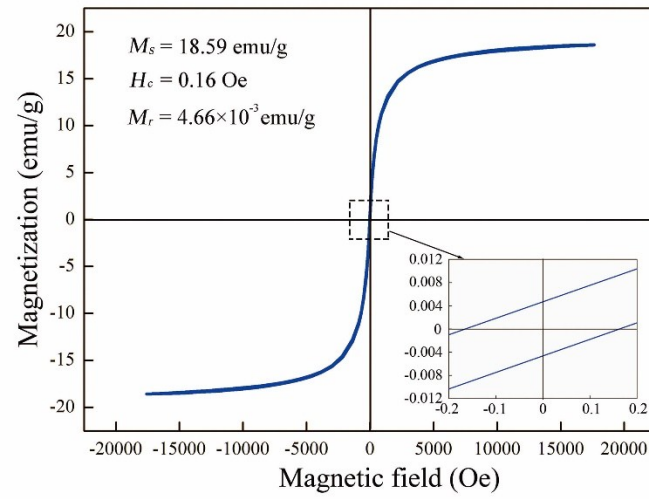

Fig.S4 Magnetic hysteresis loops for NiFe<sub>2</sub>O<sub>4</sub>/r-GO samples.

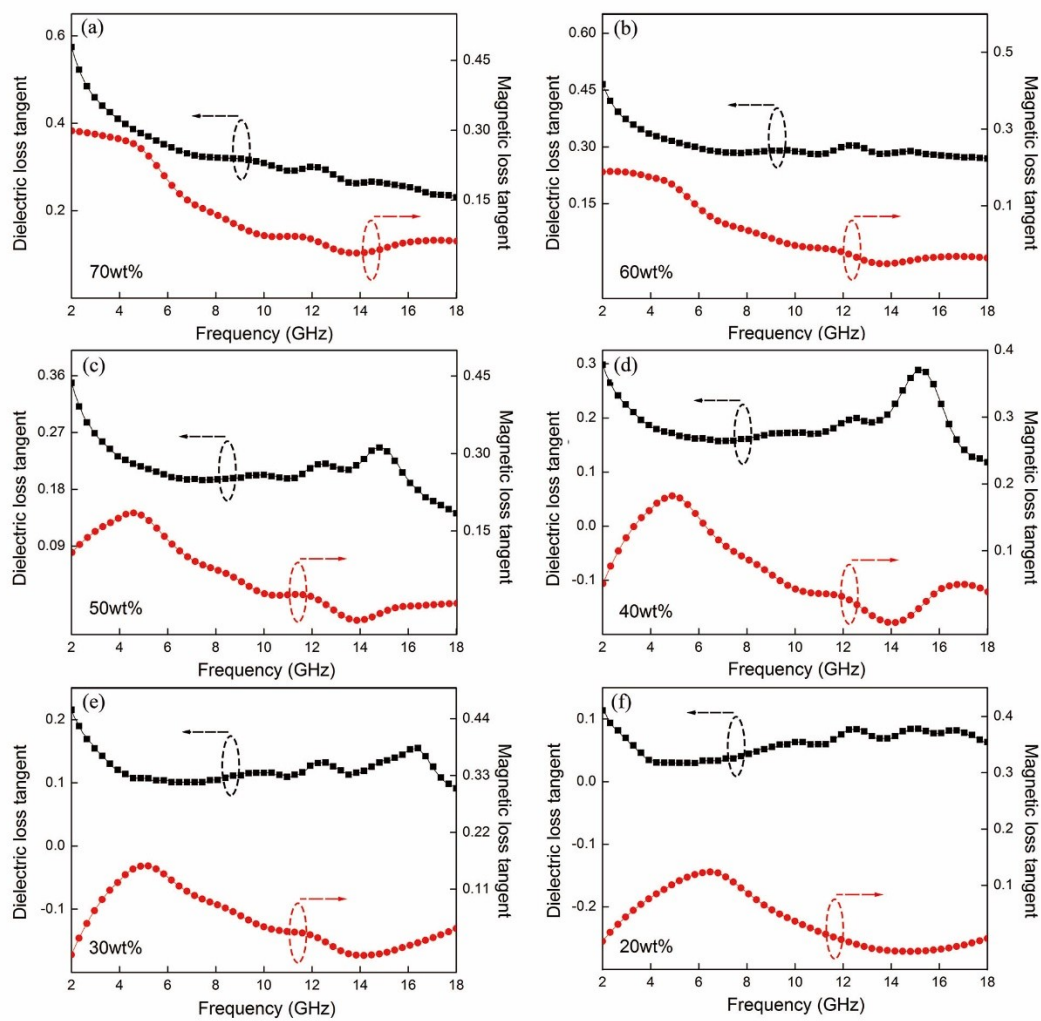

Fig.S5 Frequency dependence of the  $\tan \delta_e$  and  $\tan \delta_m$  of the samples with different NiFe<sub>2</sub>O<sub>4</sub>/r-GO loadings (a-f).

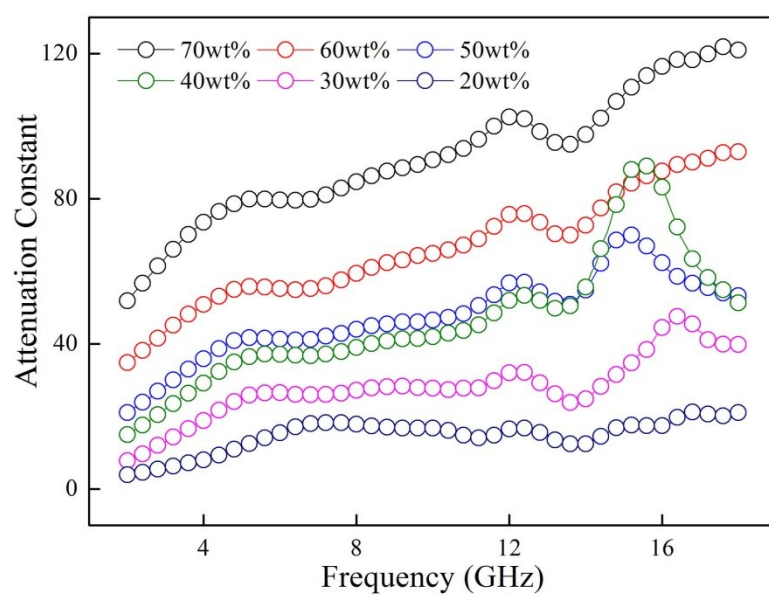

Fig.S6 Microwave attenuation constants ( $\alpha$ ) of the samples with different loadings

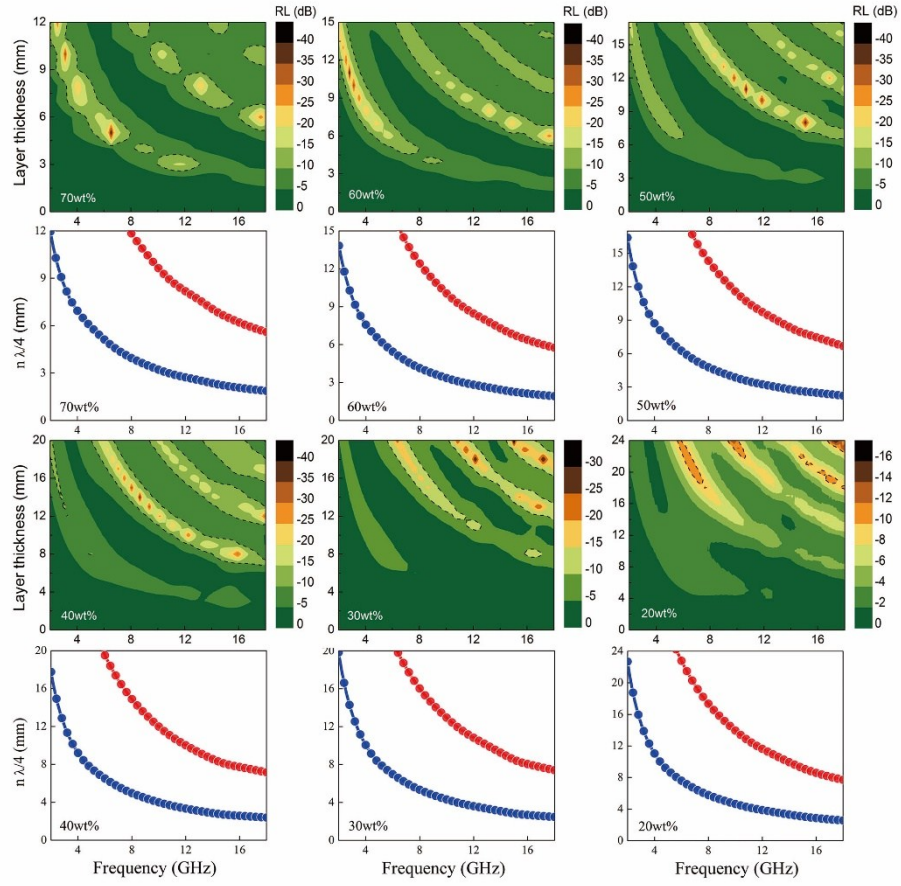

Fig.S7 Dependence of color maps of the reflection loss on frequency at various thickness and dependence of  $\lambda/4$  and  $3\lambda/4$  thickness on frequency for the samples with different  $\text{NiFe}_2\text{O}_4/\text{r-GO}$  loadings.
